# Supplementary material for: Transcriptomic study to understand thermal adaptation in a high temperature-tolerant strain of Pyropia haitanensis
Source: PLoS One. 2018 Apr 25;13(4):e0195842. doi: 10.1371/journal.pone.0195842 (PMC5919043; doi:10.1371/journal.pone.0195842)
Supplement: S3 File — (XLS) [file pone.0195842.s006.xls]

## Sheet: Pyropia_haitanensis-Unigene.fa
S3 File: KEGG annotation of 34,465 unigenes identified in the transcriptome of P. haitanensis
#Pathway	Count (8124)	Pathway ID	Genes	KOs
Metabolic pathways	2069	ko01100	Unigene0000047;Unigene0000052;Unigene0000059;Unigene0000074;Unigene0000082;Unigene0000099;Unigene0000131;Unigene0000135;Unigene0000137;Unigene0000145;Unigene0000146;Unigene0000151;Unigene0000168;Unigene0000169;Unigene0000176;Unigene0000221;Unigene0000222;Unigene0000225;Unigene0000242;Unigene0000249;Unigene0000267;Unigene0000281;Unigene0000282;Unigene0000289;Unigene0000291;Unigene0000293;Unigene00…	K00500+K03017+K05546+K01803+K02132+K02434+K01519+K01254+K08912+K00958+K04708+K02265+K00228+K01966+K01969+K00227+K01968+K09834+K01689+K06443+K01092+K10047+K01760+K01758+K01657+K01115+K01114+K00010+K02261+K03010+K01100+K01648+K01755+K03040+K01637+K02685+K01958+K00253+K07513+K04712+K07151+K00939+K02114+K02112+K13421+K03661+K13519+K05857+K01177+K00654+K00058+K03943+K00164+K01647+K00297+K01762+K02350+…
RNA transport	1015	ko03013	Unigene0000037;Unigene0000149;Unigene0000203;Unigene0000232;Unigene0000294;Unigene0000369;Unigene0000410;Unigene0000413;Unigene0000426;Unigene0000459;Unigene0000528;Unigene0000543;Unigene0000547;Unigene0000734;Unigene0000757;Unigene0000789;Unigene0000849;Unigene0000868;Unigene0000869;Unigene0000876;Unigene0000906;Unigene0000969;Unigene0000990;Unigene0001176;Unigene0001273;Unigene0001309;Unigene00…	K13171+K03254+K09291+K14293+K14325+K03238+K03253+K13126+K03248+K03249+K03242+K03259+K12876+K07936+K13137+K03243+K03239+K12160+K14306+K12878+K03260+K00784+K12877+K03247+K03245+K03113+K14290+K07562+K14317+K03251+K03252+K03257+K13025+K14298+K03262+K12812+K14297+K03231+K03250+K14327+K12882+K02516+K00974+K03237+K03539+K10577+K14004+K12879+K03246+K12883+K12881+K14319+K14288+K03236+K12880+K03537+K14313+…
Biosynthesis of secondary metabolites	905	ko01110	Unigene0000074;Unigene0000168;Unigene0000176;Unigene0000225;Unigene0000242;Unigene0000249;Unigene0000267;Unigene0000281;Unigene0000282;Unigene0000293;Unigene0000322;Unigene0000323;Unigene0000349;Unigene0000362;Unigene0000436;Unigene0000552;Unigene0000818;Unigene0000825;Unigene0000896;Unigene0000901;Unigene0000934;Unigene0001058;Unigene0001059;Unigene0001124;Unigene0001158;Unigene0001165;Unigene00…	K01803+K00228+K00227+K09834+K01689+K06443+K01092+K10047+K01760+K01657+K00010+K01648+K11778+K01755+K07513+K00939+K00164+K01647+K01762+K00660+K00787+K01835+K00382+K01698+K01900+K05917+K01568+K00237+K00948+K01834+K00134+K00088+K02437+K00033+K00106+K00626+K01704+K00012+K00940+K00765+K01783+K00128+K00850+K00549+K01641+K00021+K00026+K12447+K00166+K02548+K00511+K00817+K01610+K09838+K00766+K00616+K00819+…
mRNA surveillance pathway	869	ko03015	Unigene0000037;Unigene0000136;Unigene0000203;Unigene0000294;Unigene0000302;Unigene0000369;Unigene0000410;Unigene0000413;Unigene0000426;Unigene0000459;Unigene0000493;Unigene0000528;Unigene0000543;Unigene0000547;Unigene0000757;Unigene0000789;Unigene0000849;Unigene0000876;Unigene0000906;Unigene0000969;Unigene0000990;Unigene0001176;Unigene0001273;Unigene0001309;Unigene0001360;Unigene0001397;Unigene00…	K13171+K03267+K14325+K14411+K06269+K13126+K12876+K03456+K04382+K14962+K12877+K11584+K13025+K12812+K14416+K14327+K12882+K14376+K14402+K14403+K11583+K14408+K14396+K04354+K14407+K14400+K12883+K14401+K12881+K03265+K06100+K00565+K13917+K14399+K14404+K06965+K14405+K14397+K14328+K14326
Ribosome	668	ko03010	Unigene0000029;Unigene0000030;Unigene0000054;Unigene0000097;Unigene0000098;Unigene0000154;Unigene0000155;Unigene0000183;Unigene0000188;Unigene0000263;Unigene0000269;Unigene0000270;Unigene0000389;Unigene0000477;Unigene0000513;Unigene0000524;Unigene0000536;Unigene0000633;Unigene0000641;Unigene0000642;Unigene0000687;Unigene0000688;Unigene0000702;Unigene0000732;Unigene0000772;Unigene0000803;Unigene00…	K02885+K02878+K02984+K02925+K02879+K02951+K02988+K02880+K02898+K02893+K02896+K02866+K02991+K02877+K02974+K02948+K02952+K02977+K02955+K02882+K02979+K02933+K02997+K02921+K02934+K02874+K02961+K02978+K02967+K02943+K02910+K02920+K02873+K02919+K02912+K02875+K02865+K02976+K02927+K02930+K02998+K02950+K02929+K02939+K02995+K02871+K02938+K02993+K02949+K02932+K02872+K02908+K02887+K02906+K02989+K02891+K02867+…
Protein processing in endoplasmic reticulum	333	ko04141	Unigene0000045;Unigene0000046;Unigene0000059;Unigene0000209;Unigene0000316;Unigene0000511;Unigene0000512;Unigene0000521;Unigene0000522;Unigene0000690;Unigene0000856;Unigene0000859;Unigene0000860;Unigene0001102;Unigene0001127;Unigene0001142;Unigene0002095;Unigene0002625;Unigene0002783;Unigene0002844;Unigene0002858;Unigene0003016;Unigene0003074;Unigene0003243;Unigene0003244;Unigene0003245;Unigene00…	K13989+K05546+K09503+K03283+K09584+K07151+K09486+K09517+K09523+K10956+K09580+K09490+K13993+K08054+K14006+K10575+K12668+K04079+K03094+K13249+K14012+K14015+K08057+K03347+K12667+K14018+K08653+K13525+K09487+K13719+K11718+K09540+K13250+K10085+K10839+K12666+K12670+K07953+K03237+K10661+K07342+K06689+K01230+K10601+K09481+K14004+K10597+K14007+K14005+K10578+K09518+K08288+K01228+K03868+K04523+K10636+K08852+…
Oxidative phosphorylation	320	ko00190	Unigene0000082;Unigene0000151;Unigene0000298;Unigene0000533;Unigene0000534;Unigene0000565;Unigene0000566;Unigene0000568;Unigene0000569;Unigene0000622;Unigene0000787;Unigene0000986;Unigene0000988;Unigene0001002;Unigene0001018;Unigene0001046;Unigene0001064;Unigene0001129;Unigene0001234;Unigene0001257;Unigene0001288;Unigene0001338;Unigene0001463;Unigene0001466;Unigene0001467;Unigene0001481;Unigene00…	K02132+K02265+K02261+K02114+K02112+K01507+K03661+K03943+K02134+K02128+K02147+K03955+K02150+K03953+K03885+K00237+K03942+K02256+K01535+K02262+K03940+K02260+K02136+K00413+K02115+K03934+K03884+K03881+K02135+K03880+K00234+K03941+K02133+K03939+K02126+K02155+K02145+K00412+K03963+K02154+K03946+K03883+K05577+K02148+K00235+K02111+K03952+K02258+K05573+K03878+K11353+K00418+K03937+K02144+K02257+K02149+K03950+…
Spliceosome	308	ko03040	Unigene0000008;Unigene0000316;Unigene0000330;Unigene0000705;Unigene0000786;Unigene0000849;Unigene0000914;Unigene0001035;Unigene0001183;Unigene0001256;Unigene0001319;Unigene0001808;Unigene0001812;Unigene0002255;Unigene0002284;Unigene0002721;Unigene0002798;Unigene0002799;Unigene0002836;Unigene0002923;Unigene0002980;Unigene0003130;Unigene0003131;Unigene0003455;Unigene0003698;Unigene0003756;Unigene00…	K12896+K03283+K12815+K12823+K12826+K12837+K12625+K12825+K12816+K12822+K12876+K12821+K12827+K11093+K12869+K12811+K12897+K12878+K12741+K12890+K12877+K11096+K10599+K13025+K11086+K12812+K12872+K12836+K12831+K12856+K12867+K12832+K12829+K12882+K12849+K12845+K12818+K12858+K12846+K12854+K12870+K12873+K12819+K12621+K12852+K11097+K12813+K12626+K12828+K12820+K12840+K12862+K12859+K11984+K12891+K12879+K12883+…
Purine metabolism	233	ko00230	Unigene0000052;Unigene0000131;Unigene0000143;Unigene0000145;Unigene0000311;Unigene0000312;Unigene0000370;Unigene0000388;Unigene0000552;Unigene0001029;Unigene0001068;Unigene0001124;Unigene0001165;Unigene0001255;Unigene0001492;Unigene0001593;Unigene0001784;Unigene0001793;Unigene0001874;Unigene0002012;Unigene0002020;Unigene0002275;Unigene0002276;Unigene0002383;Unigene0002385;Unigene0002724;Unigene00…	K03017+K01519+K00962+K00958+K03010+K03040+K02685+K00939+K00942+K03013+K01835+K10807+K00948+K00088+K00106+K00940+K03008+K00856+K01120+K13755+K00860+K00365+K14641+K03043+K02324+K03021+K01945+K01756+K03046+K03019+K00873+K03002+K00602+K13484+K03007+K03006+K02684+K03012+K01466+K03025+K03009+K02327+K01923+K02335+K01933+K03018+K01510+K13811+K00760+K03000+K01952+K03016+K01490+K00601+K01522+K00526+K10808+…
Glycolysis / Gluconeogenesis	211	ko00010	Unigene0000074;Unigene0000242;Unigene0001124;Unigene0001158;Unigene0001282;Unigene0001385;Unigene0001540;Unigene0001554;Unigene0001578;Unigene0001579;Unigene0002140;Unigene0002349;Unigene0003142;Unigene0003162;Unigene0003278;Unigene0003338;Unigene0003545;Unigene0003775;Unigene0004249;Unigene0004602;Unigene0004624;Unigene0005758;Unigene0005870;Unigene0005923;Unigene0005973;Unigene0005974;Unigene00…	K01803+K01689+K01835+K00382+K01568+K01834+K00134+K00128+K00850+K01610+K00162+K03841+K00627+K01895+K01623+K00161+K14085+K00873+K01785+K00002+K13953+K01624+K01810+K00016+K00927+K01792+K00845+K00121+K00131+K00001+K00844
Endocytosis	184	ko04144	Unigene0000081;Unigene0000113;Unigene0000289;Unigene0000316;Unigene0000531;Unigene0000532;Unigene0000592;Unigene0000870;Unigene0001010;Unigene0001430;Unigene0002298;Unigene0002302;Unigene0002462;Unigene0002880;Unigene0002881;Unigene0002882;Unigene0003216;Unigene0003356;Unigene0003503;Unigene0003569;Unigene0003907;Unigene0004388;Unigene0004590;Unigene0004658;Unigene0004709;Unigene0004710;Unigene00…	K12479+K07897+K01115+K03283+K12196+K12195+K12198+K11824+K12183+K12486+K07905+K04646+K11866+K11826+K00889+K01528+K11827+K12197+K12184+K12200+K12194+K12199+K12471+K12191+K12493+K12188+K11839+K07888+K12492
Pyrimidine metabolism	176	ko00240	Unigene0000052;Unigene0000131;Unigene0000143;Unigene0000311;Unigene0000312;Unigene0000370;Unigene0000388;Unigene0000606;Unigene0000812;Unigene0001011;Unigene0001063;Unigene0001068;Unigene0001255;Unigene0001274;Unigene0001531;Unigene0001793;Unigene0001874;Unigene0002020;Unigene0002936;Unigene0003141;Unigene0003219;Unigene0003220;Unigene0003221;Unigene0003286;Unigene0003347;Unigene0003348;Unigene00…	K03017+K01519+K00962+K03010+K03040+K02685+K13421+K00384+K13800+K00207+K03013+K10807+K01718+K01464+K00940+K03008+K14641+K03043+K01937+K02324+K00761+K03021+K01489+K01431+K03046+K03019+K03002+K13998+K03007+K03006+K02684+K01520+K03012+K03025+K03009+K02327+K02335+K11541+K00609+K01955+K03018+K01510+K03000+K03016+K00876+K00254+K00526+K10808+K02999+K03014+K03023+K03020+K03027+K12304+K01465+K01956+K03022+…
RNA degradation	168	ko03018	Unigene0000143;Unigene0000242;Unigene0000462;Unigene0000463;Unigene0000515;Unigene0000876;Unigene0000921;Unigene0000922;Unigene0001151;Unigene0001183;Unigene0001546;Unigene0001608;Unigene0001793;Unigene0002350;Unigene0003404;Unigene0003405;Unigene0003450;Unigene0003752;Unigene0004080;Unigene0004107;Unigene0004108;Unigene0004276;Unigene0005058;Unigene0005420;Unigene0005605;Unigene0005606;Unigene00…	K00962+K01689+K04077+K03514+K13126+K12614+K12599+K12598+K12625+K12580+K03654+K12603+K12591+K04043+K12613+K12581+K12618+K12611+K12606+K12619+K12621+K12620+K12626+K12605+K14442+K00937+K12572+K12585+K12604+K10643+K11600+K03678+K03679+K01148+K12624+K12571+K12602+K07573+K12627+K03681+K12623+K12622
Phagosome	162	ko04145	Unigene0000113;Unigene0000622;Unigene0000859;Unigene0000860;Unigene0001002;Unigene0001046;Unigene0001471;Unigene0002144;Unigene0002149;Unigene0002320;Unigene0002625;Unigene0002744;Unigene0002818;Unigene0002819;Unigene0002820;Unigene0003216;Unigene0003396;Unigene0003451;Unigene0003452;Unigene0003453;Unigene0003763;Unigene0004255;Unigene0004274;Unigene0004545;Unigene0004546;Unigene0004547;Unigene00…	K07897+K03661+K10956+K02147+K02150+K05692+K10414+K01365+K07375+K08054+K04392+K02155+K07374+K08057+K02145+K02154+K00914+K02148+K02144+K02149+K07342+K08517+K09481+K02146+K10413+K02153+K02152+K02151+K07888
Aminoacyl-tRNA biosynthesis	158	ko00970	Unigene0000021;Unigene0000099;Unigene0000572;Unigene0000834;Unigene0000850;Unigene0000936;Unigene0001116;Unigene0001353;Unigene0001354;Unigene0001520;Unigene0001672;Unigene0002317;Unigene0002318;Unigene0002319;Unigene0003085;Unigene0003543;Unigene0003931;Unigene0003932;Unigene0004014;Unigene0004015;Unigene0004048;Unigene0004049;Unigene0005646;Unigene0005647;Unigene0005648;Unigene0005701;Unigene00…	K01872+K02434+K01881+K01868+K04567+K01883+K01873+K01887+K01869+K01870+K01889+K01875+K01880+K01892+K01876+K01893+K01866+K01885+K01874+K01886+K01867+K01890+K00604+K02433+K14164
Ribosome biogenesis in eukaryotes	157	ko03008	Unigene0000141;Unigene0000142;Unigene0000366;Unigene0000852;Unigene0000853;Unigene0001178;Unigene0001618;Unigene0001648;Unigene0001671;Unigene0001970;Unigene0002175;Unigene0003255;Unigene0003997;Unigene0004205;Unigene0004370;Unigene0004422;Unigene0004423;Unigene0004424;Unigene0004463;Unigene0004464;Unigene0004465;Unigene0004632;Unigene0004633;Unigene0004696;Unigene0004964;Unigene0005567;Unigene00…	K11131+K03115+K14565+K11129+K03264+K07178+K14521+K07936+K14573+K14553+K14563+K14290+K07562+K03097+K14546+K14572+K14556+K06943+K14564+K14574+K14538+K14539+K14575+K11883+K12618+K14568+K14549+K12845+K14559+K14558+K14571+K11128+K12619+K14536+K14566+K03539+K07179+K14569+K14537+K11108+K14567+K14552+K14554+K14535+K14560+K14544+K14561+K14555+K03537+K11130
Pyruvate metabolism	152	ko00620	Unigene0000394;Unigene0001158;Unigene0001807;Unigene0002140;Unigene0002817;Unigene0003162;Unigene0003338;Unigene0003545;Unigene0004249;Unigene0004466;Unigene0004467;Unigene0004468;Unigene0004624;Unigene0004861;Unigene0005044;Unigene0005045;Unigene0005758;Unigene0006194;Unigene0006195;Unigene0006311;Unigene0006352;Unigene0006683;Unigene0006692;Unigene0006693;Unigene0006774;Unigene0006775;Unigene00…	K01958+K00382+K00626+K00128+K00026+K01610+K00162+K00627+K01895+K00161+K14085+K00873+K11262+K01962+K01759+K00029+K00016+K00028+K01961+K01069+K00102+K00025+K01595+K01649
Citrate cycle (TCA cycle)	150	ko00020	Unigene0000322;Unigene0000323;Unigene0000394;Unigene0000818;Unigene0000825;Unigene0001158;Unigene0001261;Unigene0001288;Unigene0002711;Unigene0002712;Unigene0002817;Unigene0002843;Unigene0003162;Unigene0003338;Unigene0003545;Unigene0003694;Unigene0003963;Unigene0003964;Unigene0004249;Unigene0004466;Unigene0004467;Unigene0004468;Unigene0004624;Unigene0005013;Unigene0005065;Unigene0005066;Unigene00…	K01648+K01958+K00164+K01647+K00382+K01900+K00237+K00026+K01610+K00162+K00234+K00658+K00627+K00030+K00161+K00235+K00031+K01679+K01681+K01899+K00025+K00236
Proteasome	149	ko03050	Unigene0000290;Unigene0000301;Unigene0000455;Unigene0000620;Unigene0000621;Unigene0000624;Unigene0000665;Unigene0000955;Unigene0001708;Unigene0001771;Unigene0001789;Unigene0002388;Unigene0002389;Unigene0002739;Unigene0002991;Unigene0002992;Unigene0003011;Unigene0003012;Unigene0003578;Unigene0003579;Unigene0003587;Unigene0003631;Unigene0003912;Unigene0003913;Unigene0004269;Unigene0004289;Unigene00…	K02731+K03031+K03033+K02739+K03064+K02725+K03065+K02732+K03028+K03061+K02730+K02728+K03032+K03035+K03036+K02735+K02736+K02727+K02729+K03062+K03029+K03039+K03066+K03038+K03063+K02726+K03037+K11599+K03030+K02737+K02738+K02734
Plant-pathogen interaction	134	ko04626	Unigene0000026;Unigene0000879;Unigene0001160;Unigene0001490;Unigene0001570;Unigene0001813;Unigene0001829;Unigene0002449;Unigene0002900;Unigene0003055;Unigene0003353;Unigene0004469;Unigene0004808;Unigene0005014;Unigene0005380;Unigene0005843;Unigene0005943;Unigene0006317;Unigene0006504;Unigene0006621;Unigene0006622;Unigene0006666;Unigene0007030;Unigene0007031;Unigene0007032;Unigene0007134;Unigene00…	K13412+K04371+K13447+K02183+K02358+K13448+K04368+K04079+K13413+K09487+K00864+K12795+K13427+K13456+K13414
Ubiquitin mediated proteolysis	126	ko04120	Unigene0000148;Unigene0000346;Unigene0001147;Unigene0001244;Unigene0001801;Unigene0001878;Unigene0001900;Unigene0002858;Unigene0002956;Unigene0002957;Unigene0003028;Unigene0003710;Unigene0003803;Unigene0003804;Unigene0003882;Unigene0004397;Unigene0004535;Unigene0004536;Unigene0004716;Unigene0004717;Unigene0004771;Unigene0004772;Unigene0005085;Unigene0006493;Unigene0006496;Unigene0007392;Unigene00…	K10588+K10579+K10609+K03364+K10580+K10576+K03178+K10575+K10143+K10592+K03094+K10599+K10590+K03347+K10587+K10144+K10582+K10686+K03869+K03358+K03363+K10610+K10140+K10573+K10577+K06689+K10589+K10601+K10688+K10597+K10685+K10578+K03872+K03348+K03868+K06688+K04649+K10684+K03355+K03873+K10581+K04554+K03357
Glyoxylate and dicarboxylate metabolism	123	ko00630	Unigene0000169;Unigene0000381;Unigene0000825;Unigene0001664;Unigene0001689;Unigene0001807;Unigene0002817;Unigene0003630;Unigene0004861;Unigene0004938;Unigene0004939;Unigene0005044;Unigene0005045;Unigene0005075;Unigene0005076;Unigene0005560;Unigene0005561;Unigene0005712;Unigene0005713;Unigene0007129;Unigene0007163;Unigene0007164;Unigene0007165;Unigene0007715;Unigene0007720;Unigene0008331;Unigene00…	K01966+K01637+K01647+K02437+K00122+K00626+K00026+K01915+K00600+K11517+K01602+K01681+K03781+K00025+K00830+K00284+K01601+K01455+K01450+K01433+K05606+K01965+K00104
Valine, leucine and isoleucine degradation	123	ko00280	Unigene0000169;Unigene0000221;Unigene0000222;Unigene0000393;Unigene0000430;Unigene0000431;Unigene0000436;Unigene0001158;Unigene0001807;Unigene0002140;Unigene0002458;Unigene0002915;Unigene0002916;Unigene0003329;Unigene0003330;Unigene0004241;Unigene0004249;Unigene0004447;Unigene0004861;Unigene0005044;Unigene0005045;Unigene0005207;Unigene0005323;Unigene0005632;Unigene0005671;Unigene0005712;Unigene00…	K01966+K01969+K01968+K00253+K07513+K00382+K00626+K00128+K01641+K00166+K00140+K05605+K00020+K00826+K07511+K00249+K14085+K00167+K05607+K09699+K05606+K01965
Carbon fixation in photosynthetic organisms	118	ko00710	Unigene0000074;Unigene0000313;Unigene0002080;Unigene0002817;Unigene0003162;Unigene0003338;Unigene0003412;Unigene0003775;Unigene0004602;Unigene0004857;Unigene0004858;Unigene0005674;Unigene0005675;Unigene0005870;Unigene0006774;Unigene0006775;Unigene0006776;Unigene0007120;Unigene0007129;Unigene0007335;Unigene0007336;Unigene0007337;Unigene0008043;Unigene0008044;Unigene0008516;Unigene0008766;Unigene00…	K01803+K01100+K01783+K00026+K01610+K01807+K03841+K14455+K00615+K01623+K00873+K01602+K01624+K00029+K00927+K00028+K14454+K00814+K00025+K01595+K01601+K00855+K05298
Glycerophospholipid metabolism	115	ko00564	Unigene0000289;Unigene0000291;Unigene0000631;Unigene0000870;Unigene0001125;Unigene0003356;Unigene0003569;Unigene0003814;Unigene0003907;Unigene0004148;Unigene0004309;Unigene0004310;Unigene0004311;Unigene0004590;Unigene0004658;Unigene0004906;Unigene0005450;Unigene0005504;Unigene0005689;Unigene0006201;Unigene0006404;Unigene0006448;Unigene0006847;Unigene0006848;Unigene0006849;Unigene0006994;Unigene00…	K01115+K01114+K13519+K01049+K00981+K08744+K00995+K13513+K13523+K00967+K13510+K00111+K00999+K00630+K14674+K00655+K00993+K06130+K13506+K00006+K00894+K08730+K13535+K05929+K13511+K14676
Arginine and proline metabolism	110	ko00330	Unigene0000362;Unigene0001624;Unigene0002140;Unigene0002581;Unigene0003401;Unigene0003546;Unigene0003547;Unigene0003548;Unigene0003620;Unigene0003621;Unigene0003630;Unigene0003840;Unigene0003841;Unigene0004069;Unigene0004093;Unigene0004856;Unigene0004857;Unigene0004858;Unigene0005172;Unigene0005536;Unigene0005537;Unigene0006352;Unigene0006585;Unigene0007163;Unigene0007164;Unigene0007165;Unigene00…	K01755+K00472+K00128+K00933+K00819+K00797+K01915+K01259+K00262+K14677+K14455+K01611+K00294+K14085+K00818+K14454+K00620+K00931+K00145+K00930+K01581+K00286+K14682+K01940+K13427+K00261+K00318+K01438+K00147+K12657
Peroxisome	109	ko04146	Unigene0000436;Unigene0000609;Unigene0001197;Unigene0001784;Unigene0001990;Unigene0002012;Unigene0002072;Unigene0002371;Unigene0002832;Unigene0003066;Unigene0003317;Unigene0003384;Unigene0003385;Unigene0003826;Unigene0003899;Unigene0004241;Unigene0004472;Unigene0005010;Unigene0005011;Unigene0005044;Unigene0005075;Unigene0005076;Unigene0005412;Unigene0006106;Unigene0007394;Unigene0007546;Unigene00…	K07513+K12261+K00232+K00106+K03426+K05677+K13348+K13342+K11187+K11147+K01897+K11517+K04564+K12663+K00031+K13346+K03781+K01578+K13347+K00830+K04565+K13341
Propanoate metabolism	107	ko00640	Unigene0000169;Unigene0001261;Unigene0001807;Unigene0002140;Unigene0002711;Unigene0002712;Unigene0003329;Unigene0003330;Unigene0004447;Unigene0004861;Unigene0005044;Unigene0005045;Unigene0005185;Unigene0005186;Unigene0005712;Unigene0005713;Unigene0005758;Unigene0005759;Unigene0006148;Unigene0006149;Unigene0006283;Unigene0006284;Unigene0006352;Unigene0006692;Unigene0006693;Unigene0006932;Unigene00…	K01966+K01900+K00626+K00128+K00140+K05605+K01895+K07511+K00249+K14085+K11262+K01962+K01899+K01578+K00016+K01961+K00823+K05606+K01965
Pentose phosphate pathway	106	ko00030	Unigene0001124;Unigene0001492;Unigene0001721;Unigene0002080;Unigene0002349;Unigene0003278;Unigene0003370;Unigene0003412;Unigene0003775;Unigene0004135;Unigene0004136;Unigene0004602;Unigene0004650;Unigene0004651;Unigene0005674;Unigene0005675;Unigene0005870;Unigene0006554;Unigene0006555;Unigene0006556;Unigene0008043;Unigene0008044;Unigene0008766;Unigene0009026;Unigene0009195;Unigene0009196;Unigene00…	K01835+K00948+K00033+K01783+K00850+K00616+K01807+K03841+K00036+K00615+K01623+K01624+K01810+K01053+K01057
Cysteine and methionine metabolism	95	ko00270	Unigene0000281;Unigene0000896;Unigene0002334;Unigene0002416;Unigene0002417;Unigene0003620;Unigene0003621;Unigene0004086;Unigene0004857;Unigene0004858;Unigene0005172;Unigene0005536;Unigene0005537;Unigene0005559;Unigene0005737;Unigene0005806;Unigene0005807;Unigene0005904;Unigene0006380;Unigene0006585;Unigene0007213;Unigene0007826;Unigene0008178;Unigene0008179;Unigene0008180;Unigene0008343;Unigene00…	K01760+K01758+K01762+K08963+K00549+K00797+K01738+K14455+K01611+K00640+K00928+K00558+K00815+K01251+K00456+K00133+K00016+K08964+K09880+K14454+K01011+K00789+K08967+K00548+K12524+K01697+K01450+K01739
Glycine, serine and threonine metabolism	94	ko00260	Unigene0000281;Unigene0000779;Unigene0001158;Unigene0001540;Unigene0001578;Unigene0001579;Unigene0002307;Unigene0002308;Unigene0003571;Unigene0004249;Unigene0004451;Unigene0004938;Unigene0004939;Unigene0005560;Unigene0005561;Unigene0005806;Unigene0005807;Unigene0005923;Unigene0005973;Unigene0005974;Unigene0006079;Unigene0006080;Unigene0006194;Unigene0006195;Unigene0006352;Unigene0006374;Unigene00…	K01758+K00058+K00382+K01834+K00281+K00639+K00600+K00928+K00831+K14085+K00605+K00133+K01754+K01696+K00830+K01079+K12524+K01697+K01733+K01620+K00827
Fructose and mannose metabolism	91	ko00051	Unigene0000074;Unigene0001067;Unigene0002349;Unigene0003278;Unigene0003775;Unigene0004602;Unigene0005175;Unigene0005870;Unigene0006378;Unigene0006725;Unigene0006961;Unigene0006962;Unigene0007198;Unigene0007200;Unigene0007901;Unigene0008043;Unigene0008044;Unigene0008766;Unigene0009337;Unigene0009588;Unigene0009781;Unigene0009782;Unigene0010216;Unigene0011136;Unigene0011325;Unigene0011520;Unigene00…	K01803+K02377+K00850+K03841+K00008+K01623+K01840+K01711+K01809+K00100+K01624+K00847+K01103+K00895+K00009+K00844
Alanine, aspartate and glutamate metabolism	87	ko00250	Unigene0000362;Unigene0003630;Unigene0004069;Unigene0004829;Unigene0004857;Unigene0004858;Unigene0005088;Unigene0005613;Unigene0006352;Unigene0007163;Unigene0007164;Unigene0007165;Unigene0007321;Unigene0007322;Unigene0007323;Unigene0007324;Unigene0007344;Unigene0007467;Unigene0010467;Unigene0010583;Unigene0010766;Unigene0010801;Unigene0010803;Unigene0010805;Unigene0010806;Unigene0011122;Unigene00…	K01755+K01915+K00262+K01953+K14455+K01756+K00294+K14454+K00814+K11541+K00609+K01955+K00830+K00820+K00135+K13566+K01940+K00823+K00261+K00764+K01939+K01956+K01580+K00827
Glutathione metabolism	86	ko00480	Unigene0000517;Unigene0001163;Unigene0001255;Unigene0001721;Unigene0001786;Unigene0001862;Unigene0003219;Unigene0003220;Unigene0003381;Unigene0003382;Unigene0003608;Unigene0003620;Unigene0003621;Unigene0003785;Unigene0004440;Unigene0004457;Unigene0004509;Unigene0004650;Unigene0004651;Unigene0004657;Unigene0005172;Unigene0005569;Unigene0005735;Unigene0006879;Unigene0006880;Unigene0007055;Unigene00…	K00432+K00799+K10807+K00033+K01469+K11204+K00383+K00797+K01255+K01256+K00036+K00031+K00434+K01920+K01581+K10808+K00681
Nucleotide excision repair	86	ko03420	Unigene0000827;Unigene0000975;Unigene0001147;Unigene0002688;Unigene0002695;Unigene0003347;Unigene0003348;Unigene0003426;Unigene0003427;Unigene0003431;Unigene0004285;Unigene0004771;Unigene0004772;Unigene0005162;Unigene0005163;Unigene0005211;Unigene0006100;Unigene0006202;Unigene0007775;Unigene0007776;Unigene0008118;Unigene0008316;Unigene0008509;Unigene0009444;Unigene0009466;Unigene0009615;Unigene00…	K10838+K10747+K10609+K10755+K04802+K02324+K10849+K03657+K03703+K10756+K10843+K02202+K10839+K02327+K10754+K07466+K02335+K10610+K10739+K03702+K10140+K03142+K10841+K10848+K10846+K03868+K03141+K10845+K03143+K01972+K03144
Fatty acid metabolism	81	ko00071	Unigene0000436;Unigene0001197;Unigene0001807;Unigene0002140;Unigene0003733;Unigene0003734;Unigene0004241;Unigene0004472;Unigene0004861;Unigene0005044;Unigene0005045;Unigene0005759;Unigene0006283;Unigene0006284;Unigene0006352;Unigene0007394;Unigene0007546;Unigene0007548;Unigene0007720;Unigene0007980;Unigene0007981;Unigene0008476;Unigene0008537;Unigene0010433;Unigene0010602;Unigene0011943;Unigene00…	K07513+K00232+K00626+K00128+K10527+K01897+K07511+K00249+K14085+K13953+K00121+K00001
Nitrogen metabolism	81	ko00910	Unigene0000265;Unigene0001728;Unigene0002401;Unigene0003630;Unigene0004069;Unigene0004122;Unigene0004288;Unigene0004829;Unigene0005026;Unigene0005088;Unigene0006351;Unigene0007163;Unigene0007164;Unigene0007165;Unigene0007321;Unigene0007322;Unigene0007323;Unigene0007324;Unigene0007467;Unigene0008544;Unigene0009207;Unigene0010317;Unigene0010378;Unigene0010408;Unigene0010599;Unigene0010766;Unigene00…	K03522+K00360+K00413+K01915+K00262+K03521+K03839+K01953+K00412+K00605+K01725+K01674+K01673+K00284+K01455+K00411+K00261+K00366
Amino sugar and nucleotide sugar metabolism	80	ko00520	Unigene0001067;Unigene0001124;Unigene0001851;Unigene0002910;Unigene0003558;Unigene0003559;Unigene0003834;Unigene0003949;Unigene0004406;Unigene0004460;Unigene0005421;Unigene0005710;Unigene0006115;Unigene0006116;Unigene0006168;Unigene0006378;Unigene0006725;Unigene0006815;Unigene0006961;Unigene0006962;Unigene0007198;Unigene0007200;Unigene0007205;Unigene0007494;Unigene0007821;Unigene0009026;Unigene00…	K02377+K01835+K00012+K12447+K01836+K00849+K12373+K00621+K01840+K12450+K01711+K01809+K01784+K01810+K00965+K01183+K00847+K10046+K00845+K00820+K00972+K00963+K00326+K00844+K06118
Ether lipid metabolism	76	ko00565	Unigene0000289;Unigene0000291;Unigene0000631;Unigene0000870;Unigene0001125;Unigene0003356;Unigene0003569;Unigene0003814;Unigene0003907;Unigene0004590;Unigene0004658;Unigene0005504;Unigene0005689;Unigene0006448;Unigene0006994;Unigene0008258;Unigene0008389;Unigene0008734;Unigene0009126;Unigene0009411;Unigene0009669;Unigene0010100;Unigene0010409;Unigene0010600;Unigene0010643;Unigene0011062;Unigene00…	K01115+K01114+K13519+K13510+K14674+K00993
Tryptophan metabolism	68	ko00380	Unigene0000818;Unigene0001400;Unigene0001807;Unigene0002140;Unigene0002807;Unigene0002843;Unigene0004861;Unigene0005044;Unigene0005045;Unigene0005065;Unigene0005066;Unigene0005398;Unigene0005759;Unigene0006352;Unigene0007720;Unigene0008746;Unigene0008747;Unigene0010081;Unigene0014287;Unigene0016038;Unigene0016121;Unigene0016153;Unigene0016372;Unigene0017339;Unigene0017590;Unigene0017770;Unigene00…	K00164+K01556+K00626+K00128+K00452+K00453+K07511+K14085+K03781+K03782+K00463
RNA polymerase	68	ko03020	Unigene0000052;Unigene0000311;Unigene0000312;Unigene0000370;Unigene0001068;Unigene0002020;Unigene0003141;Unigene0004907;Unigene0005171;Unigene0005739;Unigene0005740;Unigene0006630;Unigene0006938;Unigene0007743;Unigene0007761;Unigene0008121;Unigene0008876;Unigene0008878;Unigene0008879;Unigene0009091;Unigene0009093;Unigene0009167;Unigene0009240;Unigene0009547;Unigene0009698;Unigene0010909;Unigene00…	K03017+K03010+K03040+K03013+K03008+K03043+K03021+K03046+K03019+K03002+K03007+K03006+K03012+K03025+K03009+K03018+K03000+K03016+K02999+K03014+K03023+K03020+K03027+K03022+K03011
Porphyrin and chlorophyll metabolism	67	ko00860	Unigene0000168;Unigene0000248;Unigene0001205;Unigene0002636;Unigene0002638;Unigene0006864;Unigene0006997;Unigene0006998;Unigene0008068;Unigene0008901;Unigene0008951;Unigene0009080;Unigene0009144;Unigene0009152;Unigene0009153;Unigene0010118;Unigene0010119;Unigene0010361;Unigene0010961;Unigene0011059;Unigene0011137;Unigene0011541;Unigene0011660;Unigene0012055;Unigene0012917;Unigene0012986;Unigene00…	K00228+K00510+K01698+K02495+K01885+K04035+K00231+K01599+K00522+K02492+K00218+K04040+K01845+K02257+K03403+K10960+K01772+K03404+K04038+K04037+K03405+K01719+K08101+K00768+K08099+K01764+K03428+K13071+K13606+K01749
DNA replication	66	ko03030	Unigene0000388;Unigene0000975;Unigene0002688;Unigene0002695;Unigene0003264;Unigene0003266;Unigene0003347;Unigene0003348;Unigene0003426;Unigene0003427;Unigene0005211;Unigene0006020;Unigene0006100;Unigene0006202;Unigene0006836;Unigene0007059;Unigene0007947;Unigene0008509;Unigene0009615;Unigene0009616;Unigene0009671;Unigene0010012;Unigene0010016;Unigene0010040;Unigene0010060;Unigene0010061;Unigene00…	K02685+K10747+K10755+K04802+K04799+K02324+K02212+K10756+K02541+K02209+K02684+K02327+K10754+K07466+K02335+K02540+K02542+K10739+K02210+K10742+K10743+K01972+K02320
Lysine degradation	64	ko00310	Unigene0000818;Unigene0001807;Unigene0002140;Unigene0002843;Unigene0003963;Unigene0003964;Unigene0004861;Unigene0005044;Unigene0005045;Unigene0005065;Unigene0005066;Unigene0005458;Unigene0005459;Unigene0005637;Unigene0005638;Unigene0005759;Unigene0006352;Unigene0006466;Unigene0006467;Unigene0007720;Unigene0011878;Unigene0016038;Unigene0016121;Unigene0016546;Unigene0017343;Unigene0017519;Unigene00…	K00164+K00626+K00128+K00658+K14157+K07511+K14085+K11423+K11422+K09188
Inositol phosphate metabolism	63	ko00562	Unigene0000074;Unigene0000267;Unigene0000291;Unigene0000293;Unigene0000660;Unigene0000901;Unigene0003329;Unigene0003330;Unigene0003814;Unigene0004238;Unigene0004796;Unigene0005594;Unigene0005746;Unigene0006054;Unigene0006148;Unigene0006149;Unigene0008130;Unigene0008510;Unigene0009337;Unigene0009736;Unigene0009749;Unigene0010120;Unigene0010503;Unigene0011520;Unigene0011521;Unigene0012212;Unigene00…	K01803+K01092+K10047+K01114+K00010+K05857+K00140+K00889+K01858+K00888+K00914+K00999
beta-Alanine metabolism	61	ko00410	Unigene0001063;Unigene0001531;Unigene0002140;Unigene0003329;Unigene0003330;Unigene0003620;Unigene0003621;Unigene0004447;Unigene0005172;Unigene0005252;Unigene0005483;Unigene0005759;Unigene0006148;Unigene0006149;Unigene0006283;Unigene0006284;Unigene0006352;Unigene0008476;Unigene0009220;Unigene0009577;Unigene0010433;Unigene0013054;Unigene0017356;Unigene0017794;Unigene0018352;Unigene0018428;Unigene00…	K00207+K01464+K00128+K00140+K00797+K05605+K01431+K01918+K07511+K00249+K14085+K01578+K00823+K01580
N-Glycan biosynthesis	57	ko00510	Unigene0000059;Unigene0000521;Unigene0000522;Unigene0003325;Unigene0004833;Unigene0004898;Unigene0004957;Unigene0004958;Unigene0005890;Unigene0005891;Unigene0006173;Unigene0006174;Unigene0007397;Unigene0007398;Unigene0007399;Unigene0007436;Unigene0007437;Unigene0008360;Unigene0008730;Unigene0009592;Unigene0009770;Unigene0009771;Unigene0009984;Unigene0011796;Unigene0012414;Unigene0013936;Unigene00…	K05546+K07151+K12668+K03847+K12667+K03843+K00737+K03844+K07252+K01001+K00721+K12666+K12670+K03846+K01230+K03849+K03845+K01228+K03848+K07432+K03842+K00726+K01231+K00729
Protein export	57	ko03060	Unigene0000859;Unigene0000860;Unigene0001127;Unigene0002446;Unigene0003438;Unigene0003451;Unigene0003452;Unigene0003453;Unigene0004539;Unigene0005199;Unigene0005295;Unigene0005913;Unigene0005914;Unigene0006220;Unigene0006557;Unigene0006931;Unigene0008354;Unigene0009779;Unigene0011341;Unigene0012071;Unigene0012228;Unigene0012397;Unigene0013192;Unigene0013194;Unigene0013196;Unigene0013589;Unigene00…	K10956+K09490+K03107+K03070+K03109+K03108+K03106+K13431+K03105+K09540+K03217+K03104+K07342+K13280+K09481+K03110+K12948+K03100+K12946
Galactose metabolism	57	ko00052	Unigene0001124;Unigene0001798;Unigene0002085;Unigene0002349;Unigene0003278;Unigene0003949;Unigene0004697;Unigene0005930;Unigene0007815;Unigene0007817;Unigene0007821;Unigene0009588;Unigene0009938;Unigene0009939;Unigene0010216;Unigene0011872;Unigene0012224;Unigene0013074;Unigene0013338;Unigene0014773;Unigene0015618;Unigene0016104;Unigene0016397;Unigene0016398;Unigene0016624;Unigene0017066;Unigene00…	K01835+K01190+K00850+K00849+K01187+K12309+K01784+K00965+K00845+K00963+K07407+K00844
Phosphatidylinositol signaling system	55	ko04070	Unigene0000267;Unigene0000660;Unigene0001570;Unigene0002900;Unigene0004238;Unigene0004309;Unigene0004310;Unigene0004311;Unigene0004796;Unigene0004808;Unigene0005746;Unigene0006054;Unigene0006317;Unigene0007319;Unigene0009190;Unigene0009255;Unigene0009736;Unigene0009749;Unigene0010120;Unigene0010369;Unigene0011537;Unigene0013370;Unigene0013497;Unigene0013548;Unigene0013724;Unigene0017178;Unigene00…	K01092+K10047+K05857+K02183+K00981+K00889+K00888+K00914+K00999
Starch and sucrose metabolism	54	ko00500	Unigene0000720;Unigene0001124;Unigene0001851;Unigene0001941;Unigene0003558;Unigene0003559;Unigene0003695;Unigene0003696;Unigene0004697;Unigene0005264;Unigene0005710;Unigene0006652;Unigene0006653;Unigene0006654;Unigene0006655;Unigene0007331;Unigene0007332;Unigene0007333;Unigene0007815;Unigene0007817;Unigene0009026;Unigene0011325;Unigene0011872;Unigene0012496;Unigene0012497;Unigene0012572;Unigene00…	K01177+K01835+K00012+K01194+K00688+K01187+K01051+K00695+K01810+K00847+K01087+K00700+K00845+K01176+K05341+K00705+K00963+K05350+K00844
Glycerolipid metabolism	54	ko00561	Unigene0000631;Unigene0001084;Unigene0001125;Unigene0001414;Unigene0002140;Unigene0002278;Unigene0002907;Unigene0004991;Unigene0006201;Unigene0006352;Unigene0007458;Unigene0009340;Unigene0010129;Unigene0011062;Unigene0011095;Unigene0011105;Unigene0011654;Unigene0012052;Unigene0012187;Unigene0012287;Unigene0012399;Unigene0016047;Unigene0016538;Unigene0017082;Unigene0017794;Unigene0018650;Unigene00…	K13519+K00679+K09480+K00128+K06119+K11155+K13513+K13523+K14085+K00002+K00630+K14674+K03715+K00864+K00655+K13506+K07407+K06118
Biosynthesis of unsaturated fatty acids	53	ko01040	Unigene0000436;Unigene0001197;Unigene0001369;Unigene0002736;Unigene0002848;Unigene0003413;Unigene0003414;Unigene0003984;Unigene0004166;Unigene0004241;Unigene0004870;Unigene0004871;Unigene0005044;Unigene0006237;Unigene0006473;Unigene0006599;Unigene0007133;Unigene0007394;Unigene0007819;Unigene0008537;Unigene0008872;Unigene0009166;Unigene0009254;Unigene0009845;Unigene0010346;Unigene0010602;Unigene00…	K07513+K00232+K10256+K00059+K10258+K00507+K10251+K03921+K10703+K10257+K10255
Photosynthesis	52	ko00195	Unigene0000565;Unigene0000566;Unigene0001013;Unigene0001989;Unigene0002718;Unigene0003108;Unigene0003109;Unigene0004085;Unigene0004965;Unigene0005224;Unigene0005351;Unigene0005988;Unigene0006081;Unigene0006105;Unigene0006635;Unigene0006636;Unigene0006637;Unigene0007913;Unigene0009878;Unigene0010617;Unigene0010711;Unigene0010736;Unigene0011142;Unigene0011143;Unigene0011362;Unigene0012075;Unigene00…	K02114+K02112+K02707+K02724+K02115+K08906+K02636+K02719+K02716+K02703+K02705+K02111+K02714+K02699+K08902+K02690+K02689+K02639+K14332+K02717+K02704+K08901+K02641+K02113+K03541+K02635+K02694+K08903+K02638+K03542
Butanoate metabolism	52	ko00650	Unigene0001807;Unigene0002458;Unigene0003545;Unigene0003732;Unigene0004861;Unigene0005044;Unigene0005045;Unigene0005207;Unigene0005759;Unigene0006240;Unigene0006311;Unigene0007011;Unigene0007012;Unigene0007013;Unigene0007720;Unigene0007901;Unigene0013140;Unigene0013819;Unigene0013823;Unigene0014519;Unigene0014520;Unigene0016038;Unigene0016057;Unigene0016709;Unigene0017179;Unigene0018002;Unigene00…	K00626+K01641+K00162+K00074+K07511+K00161+K00100+K01652+K00135+K00823+K01907+K00109+K01653+K01580
Tyrosine metabolism	52	ko00350	Unigene0001556;Unigene0001633;Unigene0002759;Unigene0003128;Unigene0004857;Unigene0004858;Unigene0007213;Unigene0007980;Unigene0007981;Unigene0008343;Unigene0008344;Unigene0008351;Unigene0008994;Unigene0009197;Unigene0010323;Unigene0010324;Unigene0010467;Unigene0010485;Unigene0010486;Unigene0011122;Unigene0012193;Unigene0014388;Unigene0014519;Unigene0014520;Unigene0014600;Unigene0016236;Unigene00…	K00451+K01555+K07253+K00817+K14455+K00815+K13953+K00457+K14454+K00135+K00121+K00599+K01800+K00001+K00545
Terpenoid backbone biosynthesis	51	ko00900	Unigene0000349;Unigene0001058;Unigene0001059;Unigene0001807;Unigene0002458;Unigene0002614;Unigene0002704;Unigene0003265;Unigene0004861;Unigene0005044;Unigene0005045;Unigene0005207;Unigene0005813;Unigene0005965;Unigene0006109;Unigene0006538;Unigene0007328;Unigene0007446;Unigene0007720;Unigene0008907;Unigene0009678;Unigene0011660;Unigene0011751;Unigene0013743;Unigene0013828;Unigene0015716;Unigene00…	K11778+K00787+K00626+K01641+K00021+K00919+K00991+K05906+K05356+K01823+K03526+K03527+K10960+K13789+K00099+K01662+K05355+K14066+K01597+K01770+K05955+K00587
Phenylalanine metabolism	46	ko00360	Unigene0000047;Unigene0002759;Unigene0003128;Unigene0003732;Unigene0004857;Unigene0004858;Unigene0006240;Unigene0007213;Unigene0008215;Unigene0008216;Unigene0008343;Unigene0008344;Unigene0008351;Unigene0008994;Unigene0009197;Unigene0010323;Unigene0010324;Unigene0010467;Unigene0010485;Unigene0010486;Unigene0011122;Unigene0013975;Unigene0014388;Unigene0016236;Unigene0016709;Unigene0017621;Unigene00…	K00500+K07253+K00817+K00074+K14455+K00815+K01904+K00457+K14454+K00588+K03782+K11188+K00430+K00487
Base excision repair	46	ko03410	Unigene0000975;Unigene0001961;Unigene0002445;Unigene0002695;Unigene0003264;Unigene0003266;Unigene0003347;Unigene0003348;Unigene0003426;Unigene0003427;Unigene0005211;Unigene0006100;Unigene0006305;Unigene0006453;Unigene0006601;Unigene0008509;Unigene0009615;Unigene0009616;Unigene0009687;Unigene0010040;Unigene0010255;Unigene0011630;Unigene0013404;Unigene0013945;Unigene0015168;Unigene0015185;Unigene00…	K10747+K10773+K03648+K04802+K04799+K02324+K10802+K02327+K02335+K10798+K01247+K03660+K10563+K10800+K03649+K10771+K01142+K01972
Mismatch repair	42	ko03430	Unigene0000625;Unigene0000975;Unigene0002100;Unigene0002688;Unigene0002695;Unigene0003426;Unigene0003427;Unigene0004285;Unigene0005211;Unigene0006202;Unigene0006958;Unigene0007378;Unigene0008396;Unigene0008509;Unigene0009615;Unigene0009616;Unigene0009671;Unigene0010012;Unigene0010016;Unigene0010343;Unigene0010789;Unigene0011630;Unigene0014322;Unigene0017383;Unigene0018564;Unigene0019371;Unigene00…	K08735+K10747+K08734+K10755+K04802+K03657+K10756+K10746+K08736+K07456+K02327+K10754+K07466+K08737+K10739+K10858+K01972
Phenylalanine, tyrosine and tryptophan biosynthesis	42	ko00400	Unigene0000047;Unigene0000282;Unigene0003128;Unigene0003324;Unigene0004857;Unigene0004858;Unigene0005329;Unigene0005330;Unigene0006730;Unigene0006731;Unigene0007213;Unigene0008343;Unigene0008344;Unigene0008351;Unigene0008555;Unigene0008559;Unigene0008576;Unigene0008994;Unigene0010467;Unigene0011122;Unigene0011144;Unigene0013975;Unigene0014388;Unigene0014862;Unigene0015403;Unigene0017621;Unigene00…	K00500+K01657+K00817+K00766+K14455+K01736+K00815+K01626+K01735+K00891+K14454+K01696+K15227+K13832+K01850+K01609+K01817+K00800
One carbon pool by folate	42	ko00670	Unigene0000890;Unigene0000891;Unigene0001047;Unigene0003161;Unigene0004938;Unigene0004939;Unigene0005560;Unigene0005561;Unigene0006983;Unigene0007006;Unigene0007085;Unigene0008544;Unigene0008865;Unigene0008866;Unigene0009237;Unigene0009238;Unigene0009670;Unigene0011928;Unigene0014360;Unigene0014478;Unigene0015065;Unigene0016427;Unigene0019994;Unigene0020546;Unigene0020554;Unigene0021155;Unigene00…	K00297+K00600+K00602+K13998+K00605+K01938+K00601+K00548+K00604+K01433+K01934
Fatty acid biosynthesis	41	ko00061	Unigene0002736;Unigene0002848;Unigene0004166;Unigene0006473;Unigene0006599;Unigene0006932;Unigene0007133;Unigene0007526;Unigene0008426;Unigene0008872;Unigene0009166;Unigene0009845;Unigene0010346;Unigene0010384;Unigene0010385;Unigene0011758;Unigene0013638;Unigene0013726;Unigene0015529;Unigene0015864;Unigene0016613;Unigene0018357;Unigene0018391;Unigene0018913;Unigene0020359;Unigene0021138;Unigene00…	K00059+K03921+K11262+K01962+K01961+K02372+K00648+K00208+K00645+K09458
Steroid biosynthesis	39	ko00100	Unigene0000176;Unigene0001265;Unigene0001617;Unigene0007376;Unigene0008367;Unigene0009054;Unigene0010165;Unigene0010166;Unigene0011062;Unigene0012949;Unigene0013354;Unigene0016135;Unigene0016409;Unigene0016892;Unigene0017982;Unigene0017983;Unigene0018313;Unigene0019410;Unigene0019626;Unigene0021783;Unigene0023391;Unigene0024131;Unigene0024253;Unigene0025375;Unigene0025734;Unigene0025762;Unigene00…	K00227+K05917+K07748+K08246+K14424+K14674+K09828+K07750+K00559+K00213+K01853+K00222+K01852+K14423
Natural killer cell mediated cytotoxicity	36	ko04650	Unigene0000879;Unigene0001160;Unigene0002687;Unigene0003055;Unigene0003396;Unigene0005017;Unigene0005380;Unigene0006621;Unigene0006622;Unigene0007808;Unigene0010930;Unigene0011450;Unigene0011452;Unigene0012111;Unigene0013377;Unigene0013378;Unigene0014517;Unigene0016084;Unigene0016509;Unigene0017349;Unigene0020614;Unigene0021710;Unigene0022783;Unigene0023316;Unigene0023406;Unigene0025454;Unigene00…	K04371+K06268+K04368+K04392
Sphingolipid metabolism	36	ko00600	Unigene0000146;Unigene0000488;Unigene0000748;Unigene0001798;Unigene0002048;Unigene0002085;Unigene0002103;Unigene0002813;Unigene0003116;Unigene0003117;Unigene0005930;Unigene0006060;Unigene0006061;Unigene0007958;Unigene0019457;Unigene0021340;Unigene0021524;Unigene0023210;Unigene0025459;Unigene0025570;Unigene0025810;Unigene0026487;Unigene0028240;Unigene0029339;Unigene0030465;Unigene0031024;Unigene00…	K04708+K04712+K00654+K01190+K01634+K12309+K07407+K12349
Ascorbate and aldarate metabolism	35	ko00053	Unigene0000267;Unigene0001851;Unigene0002140;Unigene0003558;Unigene0003559;Unigene0005181;Unigene0005710;Unigene0006352;Unigene0006658;Unigene0008733;Unigene0010927;Unigene0011349;Unigene0011350;Unigene0011466;Unigene0012173;Unigene0012540;Unigene0014416;Unigene0014905;Unigene0017794;Unigene0018704;Unigene0019092;Unigene0019287;Unigene0021502;Unigene0022892;Unigene0023792;Unigene0025353;Unigene00…	K10047+K00012+K00128+K14190+K14085+K00434+K01053+K08232+K00064+K10046+K00225+K00423
Selenocompound metabolism	34	ko00450	Unigene0000145;Unigene0000281;Unigene0000812;Unigene0002416;Unigene0002417;Unigene0003219;Unigene0003220;Unigene0003221;Unigene0003382;Unigene0003555;Unigene0005737;Unigene0007468;Unigene0007469;Unigene0009564;Unigene0009601;Unigene0010543;Unigene0010544;Unigene0011583;Unigene0013606;Unigene0015065;Unigene0018486;Unigene0018556;Unigene0021586;Unigene0021769;Unigene0023891;Unigene0025255;Unigene00…	K00958+K01760+K01758+K00384+K00549+K11717+K01008+K01874+K13811+K00548+K01739
Ubiquinone and other terpenoid-quinone biosynthesis	34	ko00130	Unigene0000225;Unigene0001241;Unigene0002977;Unigene0006509;Unigene0007213;Unigene0008203;Unigene0008215;Unigene0008216;Unigene0008343;Unigene0008344;Unigene0009197;Unigene0009731;Unigene0010290;Unigene0010323;Unigene0010324;Unigene0010485;Unigene0010486;Unigene0012220;Unigene0016227;Unigene0016236;Unigene0019297;Unigene0019417;Unigene0019418;Unigene0020153;Unigene0021981;Unigene0022386;Unigene00…	K09834+K12501+K02548+K06126+K00815+K00591+K00568+K01904+K00457+K05928+K06134+K12502+K01661+K06127+K02552+K14759+K09833+K14760
Pentose and glucuronate interconversions	33	ko00040	Unigene0001851;Unigene0002080;Unigene0002140;Unigene0003206;Unigene0003558;Unigene0003559;Unigene0005264;Unigene0005710;Unigene0014905;Unigene0015019;Unigene0015618;Unigene0017794;Unigene0018704;Unigene0018783;Unigene0019092;Unigene0019287;Unigene0019640;Unigene0021502;Unigene0022888;Unigene0022892;Unigene0023792;Unigene0025353;Unigene0026335;Unigene0026590;Unigene0026754;Unigene0027220;Unigene00…	K00012+K01783+K00128+K01728+K01051+K00963+K00065
alpha-Linolenic acid metabolism	32	ko00592	Unigene0000436;Unigene0001197;Unigene0003064;Unigene0003065;Unigene0003733;Unigene0003734;Unigene0004241;Unigene0005044;Unigene0006358;Unigene0007394;Unigene0007966;Unigene0008446;Unigene0008456;Unigene0008537;Unigene0010602;Unigene0011062;Unigene0013412;Unigene0013863;Unigene0015473;Unigene0018210;Unigene0022218;Unigene0023377;Unigene0025451;Unigene0029135;Unigene0029393;Unigene0029656;Unigene00…	K07513+K00232+K05894+K10527+K00454+K14674+K01723+K10529
Basal transcription factors	32	ko03022	Unigene0001227;Unigene0001645;Unigene0002707;Unigene0005226;Unigene0006438;Unigene0008118;Unigene0008316;Unigene0008816;Unigene0009942;Unigene0011388;Unigene0012122;Unigene0012384;Unigene0012639;Unigene0012970;Unigene0016090;Unigene0019395;Unigene0021473;Unigene0022867;Unigene0023174;Unigene0023332;Unigene0024300;Unigene0024554;Unigene0024750;Unigene0025394;Unigene0028179;Unigene0028202;Unigene00…	K03125+K03134+K03131+K03124+K03137+K10843+K02202+K03135+K03142+K03120+K03122+K14535+K03141+K03130+K03133+K10845+K03143+K03144
Valine, leucine and isoleucine biosynthesis	32	ko00290	Unigene0001826;Unigene0003545;Unigene0005671;Unigene0006311;Unigene0007011;Unigene0007012;Unigene0007013;Unigene0008664;Unigene0009015;Unigene0009016;Unigene0009780;Unigene0010205;Unigene0010436;Unigene0010883;Unigene0011664;Unigene0013140;Unigene0013477;Unigene0013478;Unigene0013819;Unigene0013823;Unigene0013935;Unigene0014177;Unigene0014408;Unigene0016057;Unigene0017179;Unigene0023342;Unigene00…	K01704+K00162+K00826+K00161+K01754+K01687+K00053+K00052+K01703+K01649+K01652+K01653
Homologous recombination	31	ko03440	Unigene0001585;Unigene0001586;Unigene0002350;Unigene0005395;Unigene0006160;Unigene0006999;Unigene0009615;Unigene0009616;Unigene0009734;Unigene0010016;Unigene0010040;Unigene0010222;Unigene0010255;Unigene0010742;Unigene0010789;Unigene0011069;Unigene0011189;Unigene0011630;Unigene0011888;Unigene0012410;Unigene0012810;Unigene0012811;Unigene0018065;Unigene0021390;Unigene0024077;Unigene0025217;Unigene00…	K04482+K10901+K03165+K10877+K10875+K02327+K10865+K07466+K02335+K10739+K10873+K03553+K10866+K08991
Histidine metabolism	31	ko00340	Unigene0002021;Unigene0002140;Unigene0003128;Unigene0006352;Unigene0008351;Unigene0008994;Unigene0011051;Unigene0013490;Unigene0013491;Unigene0013849;Unigene0016535;Unigene0016965;Unigene0017794;Unigene0018704;Unigene0019092;Unigene0021469;Unigene0021502;Unigene0022892;Unigene0024105;Unigene0025218;Unigene0025353;Unigene0026292;Unigene0026754;Unigene0028056;Unigene0028097;Unigene0028220;Unigene00…	K00765+K00128+K00817+K14085+K00013+K01663+K11755+K00599+K01693
SNARE interactions in vesicular transport	31	ko04130	Unigene0000324;Unigene0000403;Unigene0000593;Unigene0000833;Unigene0001033;Unigene0002869;Unigene0013038;Unigene0014170;Unigene0015148;Unigene0015351;Unigene0015866;Unigene0016725;Unigene0017055;Unigene0018292;Unigene0018299;Unigene0019960;Unigene0021067;Unigene0023898;Unigene0025171;Unigene0026397;Unigene0026416;Unigene0027094;Unigene0029670;Unigene0029994;Unigene0030898;Unigene0031126;Unigene00…	K08515+K08493+K08486+K08516+K08490+K08517+K08504+K08501+K08503+K08489+K08509+K08508+K08495+K08498
Sulfur metabolism	31	ko00920	Unigene0000145;Unigene0000281;Unigene0000383;Unigene0002724;Unigene0004086;Unigene0004184;Unigene0005559;Unigene0007090;Unigene0011583;Unigene0011851;Unigene0014538;Unigene0017027;Unigene0017057;Unigene0017707;Unigene0018337;Unigene0021586;Unigene0023636;Unigene0024169;Unigene0025415;Unigene0025429;Unigene0029048;Unigene0029114;Unigene0029658;Unigene0030035;Unigene0030318;Unigene0032389;Unigene00…	K00958+K01760+K00387+K00860+K01738+K01082+K00640+K00390+K13811+K00392+K01014+K01739
ABC transporters	30	ko02010	Unigene0001040;Unigene0001821;Unigene0002072;Unigene0003384;Unigene0003385;Unigene0003716;Unigene0003717;Unigene0004552;Unigene0004974;Unigene0006582;Unigene0009212;Unigene0009611;Unigene0010256;Unigene0011644;Unigene0012394;Unigene0012684;Unigene0012685;Unigene0012686;Unigene0014609;Unigene0015299;Unigene0015540;Unigene0016491;Unigene0020213;Unigene0020728;Unigene0032099;Unigene0033091;Unigene00…	K05663+K05681+K05677+K05658+K05641+K05643
Photosynthesis - antenna proteins	27	ko00196	Unigene0000137;Unigene0001207;Unigene0001485;Unigene0002727;Unigene0004336;Unigene0005924;Unigene0006063;Unigene0007121;Unigene0007226;Unigene0008600;Unigene0009544;Unigene0010631;Unigene0010860;Unigene0011087;Unigene0011886;Unigene0012108;Unigene0012163;Unigene0014104;Unigene0014228;Unigene0014626;Unigene0014720;Unigene0014931;Unigene0015086;Unigene0016187;Unigene0027544;Unigene0028850;Unigene00…	K08912+K08913+K08907+K08910+K08917+K02284+K02093+K02092+K02095+K02286+K08908+K08911+K02290+K02289+K02288+K02094
Pantothenate and CoA biosynthesis	25	ko00770	Unigene0001063;Unigene0001531;Unigene0005252;Unigene0005483;Unigene0005671;Unigene0008664;Unigene0009780;Unigene0010205;Unigene0010436;Unigene0011431;Unigene0013819;Unigene0013823;Unigene0016355;Unigene0017356;Unigene0018428;Unigene0019028;Unigene0022138;Unigene0025852;Unigene0025959;Unigene0027364;Unigene0029839;Unigene0032045;Unigene0032502;Unigene0033045;Unigene0033989	K00207+K01464+K01431+K01918+K00826+K01687+K00053+K00859+K01652+K00606+K09680+K01653+K01598
Fatty acid elongation in mitochondria	25	ko00062	Unigene0003413;Unigene0003414;Unigene0005759;Unigene0006237;Unigene0007631;Unigene0007632;Unigene0007819;Unigene0012530;Unigene0015770;Unigene0016518;Unigene0016621;Unigene0016958;Unigene0018671;Unigene0018865;Unigene0018923;Unigene0019915;Unigene0022015;Unigene0022399;Unigene0023328;Unigene0024497;Unigene0028570;Unigene0030176;Unigene0030523;Unigene0031695;Unigene0033949	K10258+K07511+K10251+K01074+K10703+K07512+K10249
Cyanoamino acid metabolism	22	ko00460	Unigene0004938;Unigene0004939;Unigene0005560;Unigene0005561;Unigene0008865;Unigene0008866;Unigene0009237;Unigene0009238;Unigene0014360;Unigene0017587;Unigene0018847;Unigene0019994;Unigene0021155;Unigene0022912;Unigene0024653;Unigene0025991;Unigene0026414;Unigene0031350;Unigene0032736;Unigene0032737;Unigene0032796;Unigene0032797	K00600+K05350+K00681
Regulation of autophagy	22	ko04140	Unigene0001021;Unigene0001303;Unigene0002895;Unigene0006054;Unigene0006744;Unigene0007105;Unigene0008161;Unigene0010659;Unigene0012131;Unigene0022057;Unigene0023832;Unigene0026324;Unigene0026894;Unigene0027444;Unigene0027901;Unigene0028246;Unigene0028985;Unigene0029137;Unigene0032628;Unigene0033094;Unigene0033314;Unigene0033907	K07198+K08341+K00914+K08269+K08343+K08332
Other glycan degradation	21	ko00511	Unigene0001798;Unigene0002085;Unigene0002418;Unigene0002419;Unigene0003910;Unigene0005930;Unigene0006115;Unigene0006116;Unigene0007494;Unigene0008166;Unigene0016181;Unigene0017300;Unigene0018241;Unigene0021694;Unigene0022921;Unigene0023060;Unigene0023295;Unigene0026624;Unigene0028289;Unigene0031220;Unigene0031898	K01190+K01191+K12311+K01227+K12309+K12373+K01192
Folate biosynthesis	19	ko00790	Unigene0003257;Unigene0005251;Unigene0006814;Unigene0007085;Unigene0009533;Unigene0009670;Unigene0010936;Unigene0011589;Unigene0015913;Unigene0016232;Unigene0018767;Unigene0021198;Unigene0022200;Unigene0024914;Unigene0026169;Unigene0028810;Unigene0031630;Unigene0031992;Unigene0033829	K03635+K01930+K01307+K13998+K13950+K01077+K03639+K01495
Phenylpropanoid biosynthesis	19	ko00940	Unigene0002140;Unigene0008215;Unigene0008216;Unigene0013975;Unigene0017587;Unigene0017770;Unigene0017771;Unigene0019253;Unigene0022466;Unigene0023672;Unigene0025567;Unigene0025715;Unigene0026414;Unigene0028097;Unigene0029072;Unigene0029791;Unigene0030307;Unigene0030308;Unigene0032288	K12355+K01904+K00588+K05350+K03782+K11188+K00430+K00487
Circadian rhythm - plant	19	ko04712	Unigene0000366;Unigene0000934;Unigene0002200;Unigene0003883;Unigene0004632;Unigene0004633;Unigene0012665;Unigene0012666;Unigene0012667;Unigene0014531;Unigene0017291;Unigene0017416;Unigene0018432;Unigene0019503;Unigene0027489;Unigene0028094;Unigene0029304;Unigene0030375;Unigene0034311	K03115+K00660+K12118+K03097+K12127
Circadian rhythm - mammal	18	ko04710	Unigene0003882;Unigene0004771;Unigene0004772;Unigene0007146;Unigene0008236;Unigene0008237;Unigene0010231;Unigene0020620;Unigene0020750;Unigene0021357;Unigene0023773;Unigene0027691;Unigene0028883;Unigene0028955;Unigene0030160;Unigene0030251;Unigene0031605;Unigene0033969	K03094+K03347+K08960+K03868+K02295
Arachidonic acid metabolism	17	ko00590	Unigene0000135;Unigene0000517;Unigene0002970;Unigene0002971;Unigene0003608;Unigene0003785;Unigene0004509;Unigene0005735;Unigene0007055;Unigene0011062;Unigene0011801;Unigene0018847;Unigene0028967;Unigene0031350;Unigene0031973;Unigene0031974;Unigene0034318	K01254+K00432+K14674+K00681+K01830
Synthesis and degradation of ketone bodies	17	ko00072	Unigene0001807;Unigene0002458;Unigene0004861;Unigene0005044;Unigene0005045;Unigene0005207;Unigene0007720;Unigene0016038;Unigene0018002;Unigene0020726;Unigene0022218;Unigene0023603;Unigene0023687;Unigene0024993;Unigene0025378;Unigene0030102;Unigene0030573	K00626+K01641
Caffeine metabolism	17	ko00232	Unigene0001784;Unigene0002012;Unigene0002832;Unigene0002872;Unigene0005010;Unigene0005011;Unigene0011805;Unigene0011894;Unigene0012415;Unigene0018150;Unigene0018825;Unigene0020029;Unigene0020206;Unigene0021056;Unigene0023709;Unigene0030315;Unigene0031564	K00106+K00365
Tropane, piperidine and pyridine alkaloid biosynthesis	16	ko00960	Unigene0003128;Unigene0004857;Unigene0004858;Unigene0007213;Unigene0008343;Unigene0008344;Unigene0008351;Unigene0008994;Unigene0010346;Unigene0010467;Unigene0011122;Unigene0014388;Unigene0017621;Unigene0018688;Unigene0024978;Unigene0025218	K00817+K14455+K00815+K08081+K14454
Plant hormone signal transduction	14	ko04075	Unigene0002717;Unigene0003934;Unigene0004615;Unigene0005518;Unigene0008608;Unigene0016679;Unigene0019317;Unigene0019719;Unigene0021828;Unigene0024363;Unigene0029061;Unigene0029325;Unigene0032129;Unigene0032365	K14487+K14497+K14432+K14504+K14510+K14509+K14431+K14498+K14492
Sulfur relay system	14	ko04122	Unigene0001275;Unigene0001930;Unigene0003257;Unigene0005343;Unigene0010916;Unigene0011589;Unigene0015913;Unigene0017460;Unigene0021577;Unigene0022660;Unigene0025709;Unigene0027718;Unigene0030053;Unigene0033829	K14168+K00566+K03635+K04487+K01011+K03639+K11996
Limonene and pinene degradation	13	ko00903	Unigene0002140;Unigene0017794;Unigene0018704;Unigene0019092;Unigene0021502;Unigene0022016;Unigene0022892;Unigene0025353;Unigene0026754;Unigene0028097;Unigene0028657;Unigene0031117;Unigene0032288	K00128+K00517
Lysine biosynthesis	13	ko00300	Unigene0005806;Unigene0005807;Unigene0006352;Unigene0008641;Unigene0008926;Unigene0009527;Unigene0015201;Unigene0015247;Unigene0023169;Unigene0023764;Unigene0026292;Unigene0031176;Unigene0031598	K00928+K14085+K01586+K00133+K10206+K12524+K00215+K01714
Vitamin B6 metabolism	13	ko00750	Unigene0002905;Unigene0002906;Unigene0006079;Unigene0006080;Unigene0016755;Unigene0017065;Unigene0023172;Unigene0025770;Unigene0027830;Unigene0033022;Unigene0033286;Unigene0033925;Unigene0033926	K00868+K00831+K06215+K01733+K08681
Glycosphingolipid biosynthesis - globo series	13	ko00603	Unigene0006115;Unigene0006116;Unigene0007494;Unigene0021524;Unigene0025570;Unigene0025810;Unigene0029339;Unigene0030465;Unigene0031024;Unigene0031025;Unigene0031220;Unigene0031898;Unigene0033207	K12373+K07407
Nicotinate and nicotinamide metabolism	12	ko00760	Unigene0001990;Unigene0006940;Unigene0010419;Unigene0012225;Unigene0013637;Unigene0019321;Unigene0022649;Unigene0025091;Unigene0025904;Unigene0026647;Unigene0028199;Unigene0030850	K03426+K01950+K00767+K00323+K00763+K06210+K00858+K03787
Isoquinoline alkaloid biosynthesis	11	ko00950	Unigene0004857;Unigene0004858;Unigene0007213;Unigene0008343;Unigene0008344;Unigene0010467;Unigene0011122;Unigene0014388;Unigene0017621;Unigene0018688;Unigene0024978	K14455+K00815+K14454
Riboflavin metabolism	11	ko00740	Unigene0002788;Unigene0005771;Unigene0007931;Unigene0016025;Unigene0018135;Unigene0019241;Unigene0020929;Unigene0021824;Unigene0025550;Unigene0027356;Unigene0032174	K00794+K14395+K00861+K00953+K00793+K01078+K14652
Flavonoid biosynthesis	10	ko00941	Unigene0000934;Unigene0006624;Unigene0012362;Unigene0013975;Unigene0014524;Unigene0019253;Unigene0019503;Unigene0028094;Unigene0029791;Unigene0034275	K00660+K05277+K05280+K00588+K00487+K00475
Linoleic acid metabolism	10	ko00591	Unigene0006358;Unigene0007901;Unigene0007966;Unigene0008446;Unigene0008456;Unigene0011062;Unigene0013412;Unigene0029393;Unigene0031837;Unigene0033961	K00454+K00100+K14674+K08262
Non-homologous end-joining	10	ko03450	Unigene0003264;Unigene0003266;Unigene0009734;Unigene0012810;Unigene0012811;Unigene0014558;Unigene0014571;Unigene0024077;Unigene0029037;Unigene0030957	K04799+K10865+K10866+K10885+K10777
Glycosphingolipid biosynthesis - ganglio series	9	ko00604	Unigene0005930;Unigene0006115;Unigene0006116;Unigene0007494;Unigene0009958;Unigene0018898;Unigene0025849;Unigene0031220;Unigene0031898	K12309+K12373+K03372
Sesquiterpenoid biosynthesis	9	ko00909	Unigene0003125;Unigene0003126;Unigene0003127;Unigene0011885;Unigene0015563;Unigene0022213;Unigene0027927;Unigene0030322;Unigene0031741	K00511+K00801
Carotenoid biosynthesis	8	ko00906	Unigene0000249;Unigene0003165;Unigene0013722;Unigene0015146;Unigene0015606;Unigene0017883;Unigene0019413;Unigene0021251	K06443+K09838+K14606+K02291+K02293+K06444+K09841+K09837
Taurine and hypotaurine metabolism	8	ko00430	Unigene0008370;Unigene0017514;Unigene0017684;Unigene0018847;Unigene0024529;Unigene0031206;Unigene0031350;Unigene0031797	K00456+K10712+K00681+K01580
Thiamine metabolism	8	ko00730	Unigene0003555;Unigene0003673;Unigene0005343;Unigene0007990;Unigene0017460;Unigene0018515;Unigene0021577;Unigene0026866	K11717+K14153+K04487+K03147
Glycosaminoglycan degradation	6	ko00531	Unigene0005930;Unigene0006115;Unigene0006116;Unigene0007494;Unigene0031220;Unigene0031898	K12309+K12373
Stilbenoid, diarylheptanoid and gingerol biosynthesis	5	ko00945	Unigene0013975;Unigene0019253;Unigene0022016;Unigene0029791;Unigene0031117	K00588+K00517+K00487
Biotin metabolism	5	ko00780	Unigene0003571;Unigene0012911;Unigene0016103;Unigene0018196;Unigene0032274	K00652+K00833+K01012
C5-Branched dibasic acid metabolism	5	ko00660	Unigene0001826;Unigene0011664;Unigene0013819;Unigene0013823;Unigene0029839	K01704+K01703+K01652+K01653
Glucosinolate biosynthesis	4	ko00966	Unigene0005671;Unigene0008664;Unigene0009780;Unigene0025959	K00826
Other types of O-glycan biosynthesis	4	ko00514	Unigene0005246;Unigene0005247;Unigene0018683;Unigene0032299	K09667
Zeatin biosynthesis	3	ko00908	Unigene0020424;Unigene0030466;Unigene0033567	K00791+K10717
Lipoic acid metabolism	3	ko00785	Unigene0014933;Unigene0014935;Unigene0019947	K03644+K03801
Glycosylphosphatidylinositol(GPI)-anchor biosynthesis	2	ko00563	Unigene0013451;Unigene0015121	K03857
Monoterpenoid biosynthesis	2	ko00902	Unigene0021989;Unigene0025694	K15095
Flavone and flavonol biosynthesis	2	ko00944	Unigene0012362;Unigene0014524	K05280
Betalain biosynthesis	1	ko00965	Unigene0028279	K00545
Benzoxazinoid biosynthesis	1	ko00402	Unigene0031196	K13223+K13225
